# Supplementary material for: Accelerated discovery and mechanical property characterization of bioresorbable amorphous alloys in the Mg–Zn–Ca and the Fe–Mg–Zn systems using high-throughput methods
Source: Royal Society of Chemistry journal article supplement (doi:10.1039/c9tb01302d), 2019-01-01
Supplement: c9tb01302d1.pdf [file c9tb01302d1.pdf]

### SUPPLEMENTARY SECTION

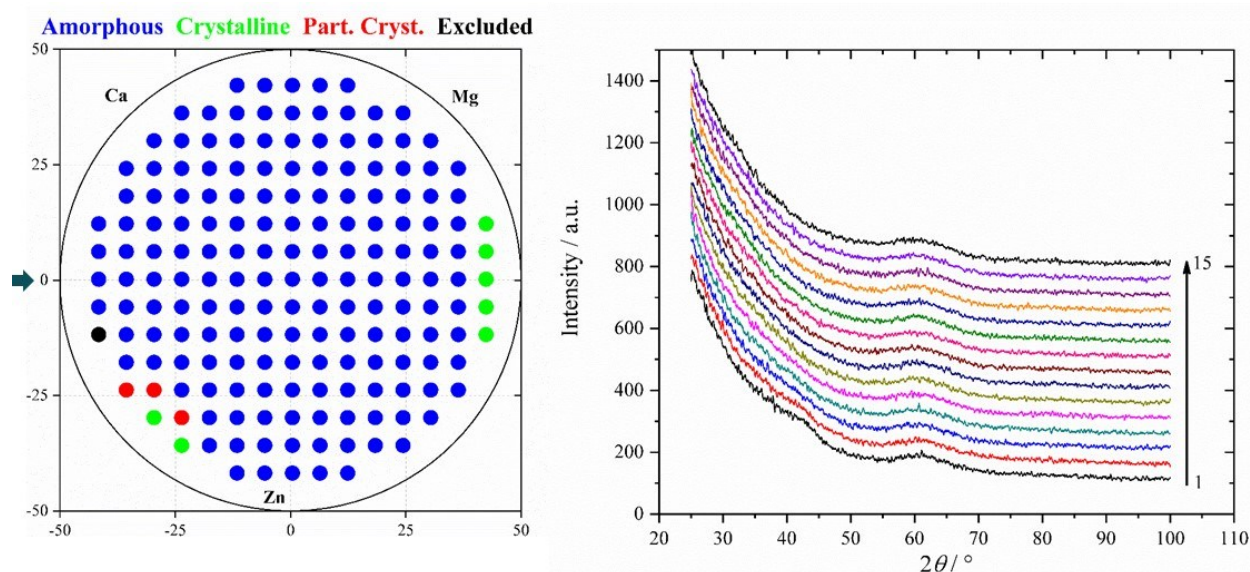

Figure S1: XRD mapping of patches in the Mg-Zn-Ca system. Left panel: Results from phase analysis using XRD mapping. Right panel: XRD spectra for one row of patches (marked by arrow in left panel, patches numbered from 1 to 15 from left to right).

Table 2: Density, Poisson's ratio, and elastic constants of base elements used in the libraries.  $T_m$  = melting temperature,  $E$  = Young's modulus,  $G$  = Shear modulus,  $K$  = Bulk modulus,  $\nu$  = Poisson's ratio. (Data taken from [www.webelements.com](http://www.webelements.com)).

| Element | Density<br>(g/cm <sup>3</sup> ) | $T_m$<br>(K) | $E$<br>(GPa) | $G$<br>(GPa) | $K$<br>(GPa) | $\nu$ | Atomic radius<br>(pm) |
|---------|---------------------------------|--------------|--------------|--------------|--------------|-------|-----------------------|
| Mg      | 1.738                           | 922          | 45           | 17           | 45           | 0.29  | 150                   |
| Fe      | 7.874                           | 1808         | 211          | 82           | 170          | 0.29  | 140                   |
| Zn      | 7.14                            | 692          | 108          | 43           | 70           | 0.25  | 135                   |
| Ca      | 1.54                            | 1112         | 20           | 7.4          | 17           | 0.31  | 180                   |
